# Supplementary material for: Release of an anti-anxiety peptide in casein hydrolysate with Aspergillus oryzae protease
Source: Royal Society of Chemistry journal article supplement (doi:10.1039/d2fo01793h), 2022-01-01
Supplement: d2fo01793h5.pdf [file d2fo01793h5.pdf]

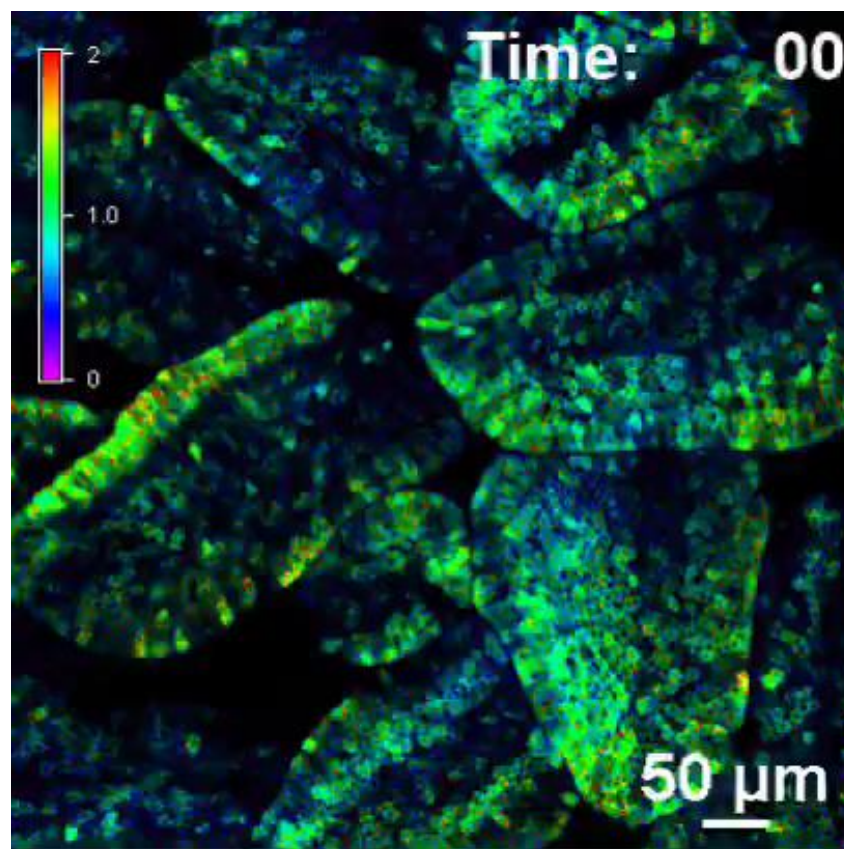

**Supplementary Movie 1.** Intravital Ca<sup>2+</sup> imaging of the intestinal epithelial cells of a ubiquitous YC3.60-expressing mouse. Ratiometric images (YFP/CFP at excitation of 458 nm) were measured every 2 seconds for 2 min (approximately 2 frame/second). CM-10 (final concentration 20 μM) was added at 45 sec the indicated time point. Real acquisition time is indicated (top).

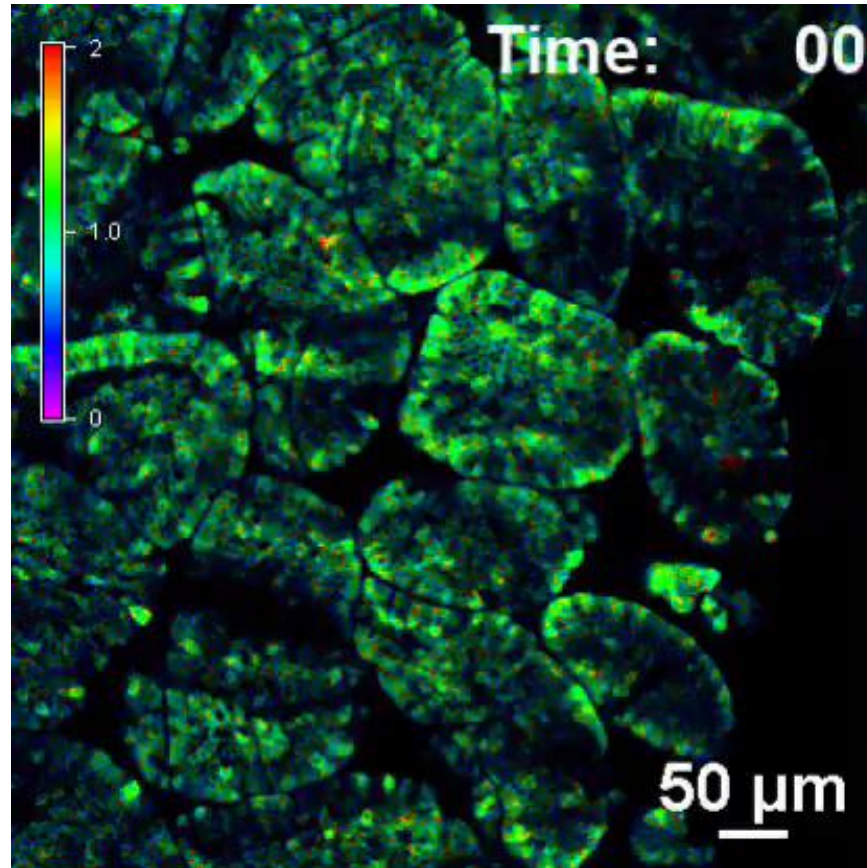

**Supplementary Movie 2.** Intravital Ca<sup>2+</sup> imaging of the intestinal epithelial cells of a ubiquitous YC3.60-expressing mouse. Ratiometric images (YFP/CFP at excitation of 458 nm) were measured every 2 seconds for 50 sec (approximately 2 frame/second). CM-10 (final concentration 20 μM + DOR-A) was added at 15 sec the indicated time point in Fig. 6C. Real acquisition time is indicated (top).

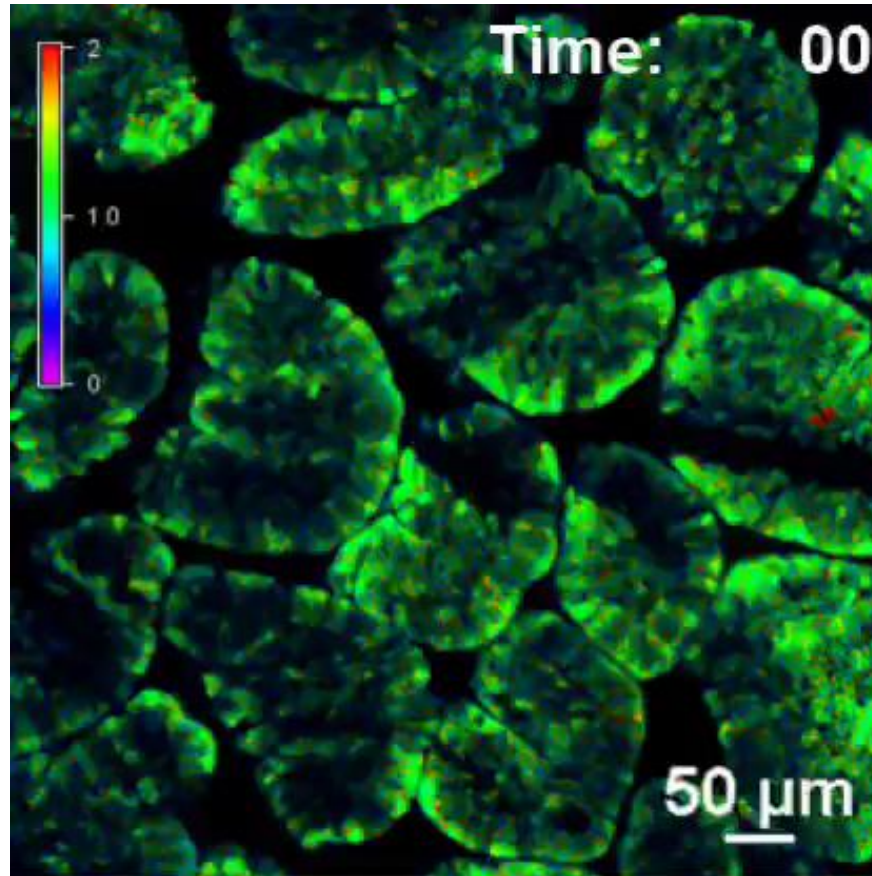

**Supplementary Movie 3.** Intravital Ca<sup>2+</sup> imaging of the intestinal epithelial cells of a ubiquitous YC3.60-expressing mouse. Ratiometric images (YFP/CFP at excitation of 458 nm) were measured every 2 seconds for 50 sec (approximately 2 frame/second). CM-10 (final concentration 20 μM + MOR-A) was added at 15 sec the indicated time point in Fig.6F. Real acquisition time is indicated (top).

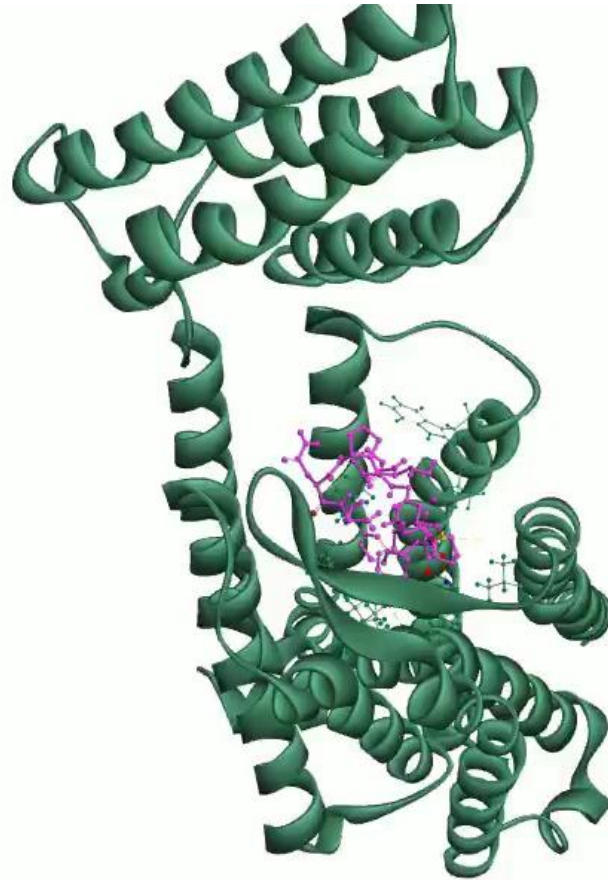

**Supplementary Movie 4.** 3D movie of docking simulation of YPFPGPIPNS for DOR.
